# Supplementary material
Source: Research Square preprint supplement (doi:10.21203/rs.3.rs-9054871/v1)
Supplement: Supplementary file 1 [file ac12edcba2bd9dd00b3e2d77.docx]

**
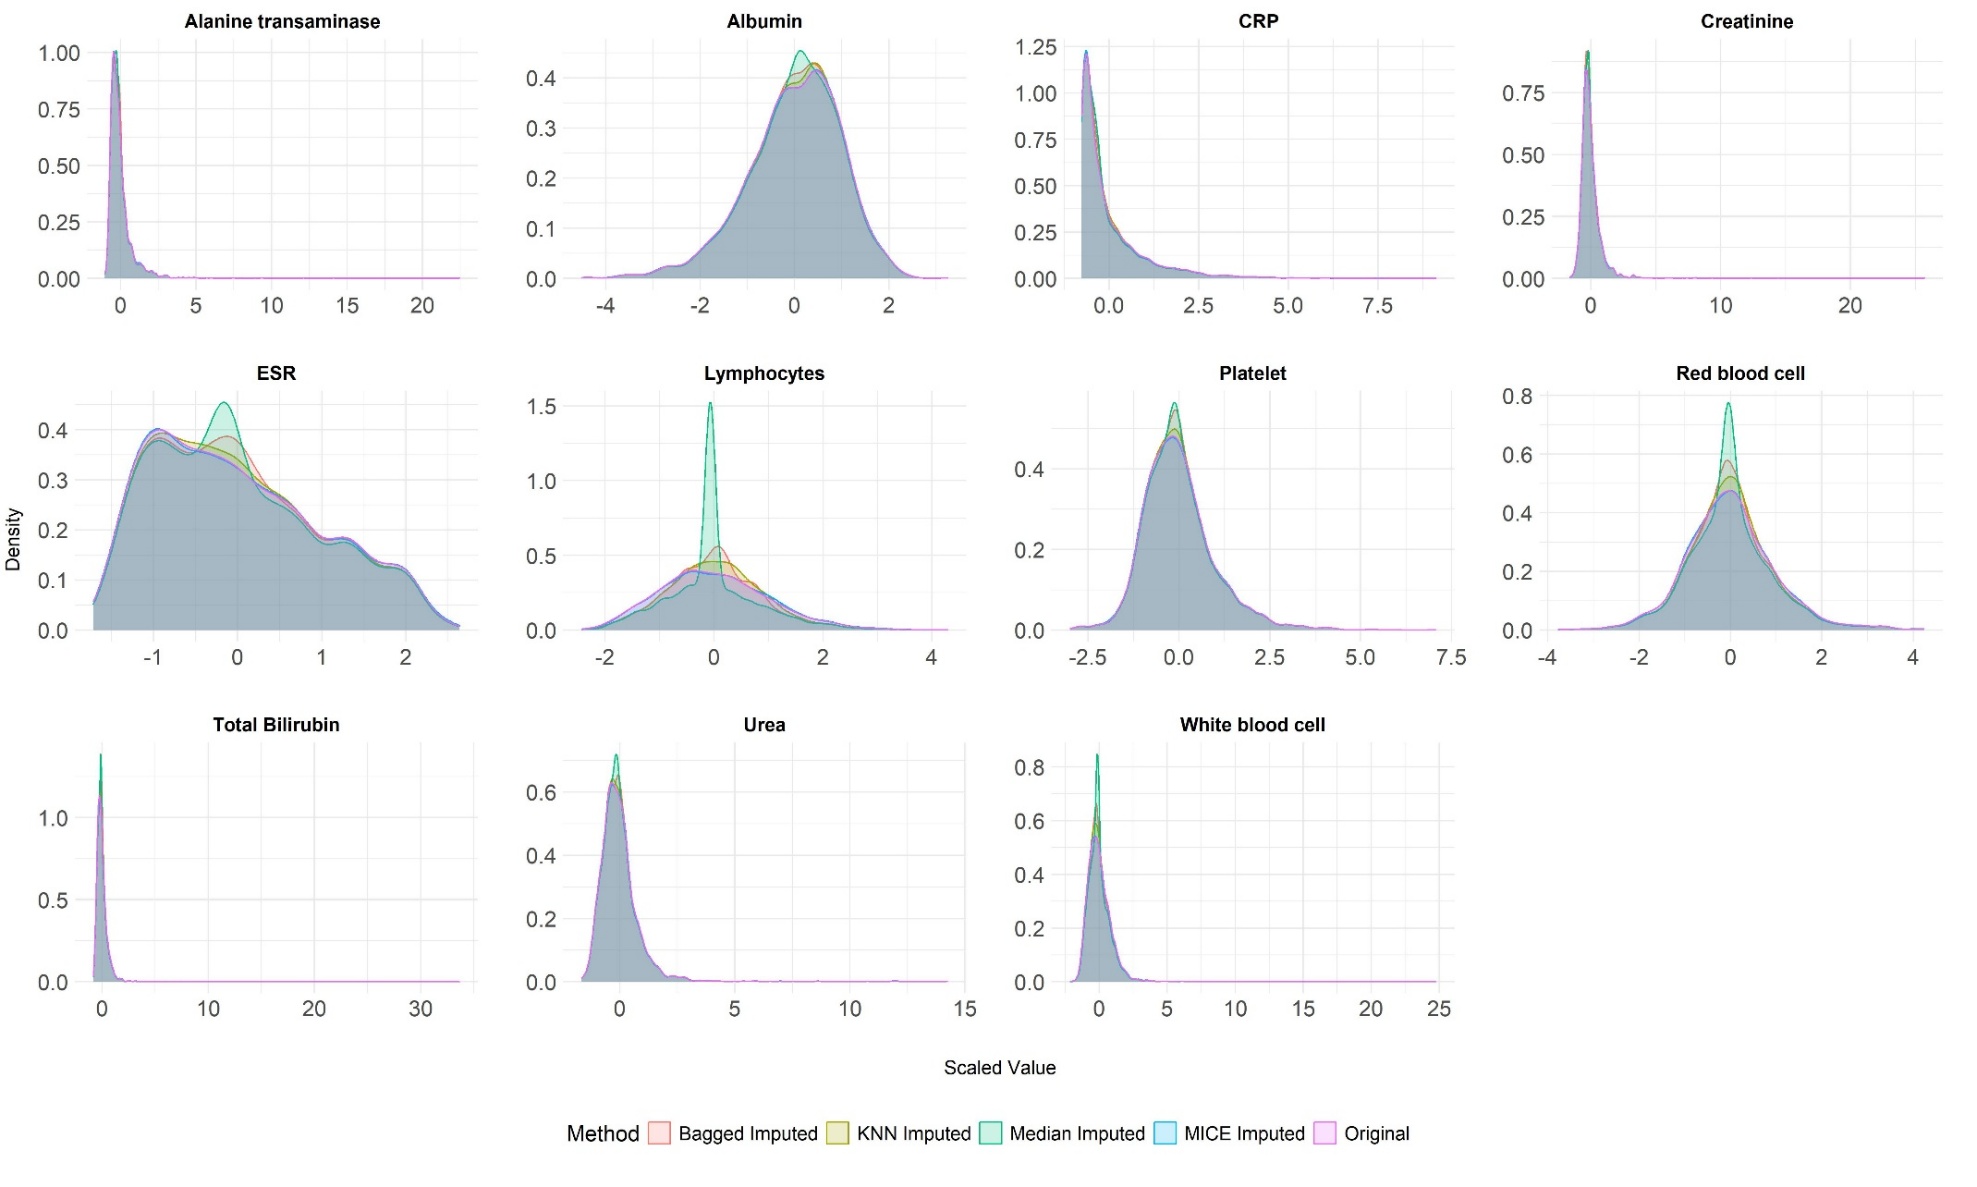
**

**Supplemental Figure 1: Density distributions of biomarkers across different imputation methods compared to original data**

The imputation method that best preserved the original distributional characteristics was selected as the final approach

CRP: C-reactive protein; ESR: erythrocyte sedimentation rate; MICE: Multiple Imputation by Chained Equations; KNN: K-nearest neighbors


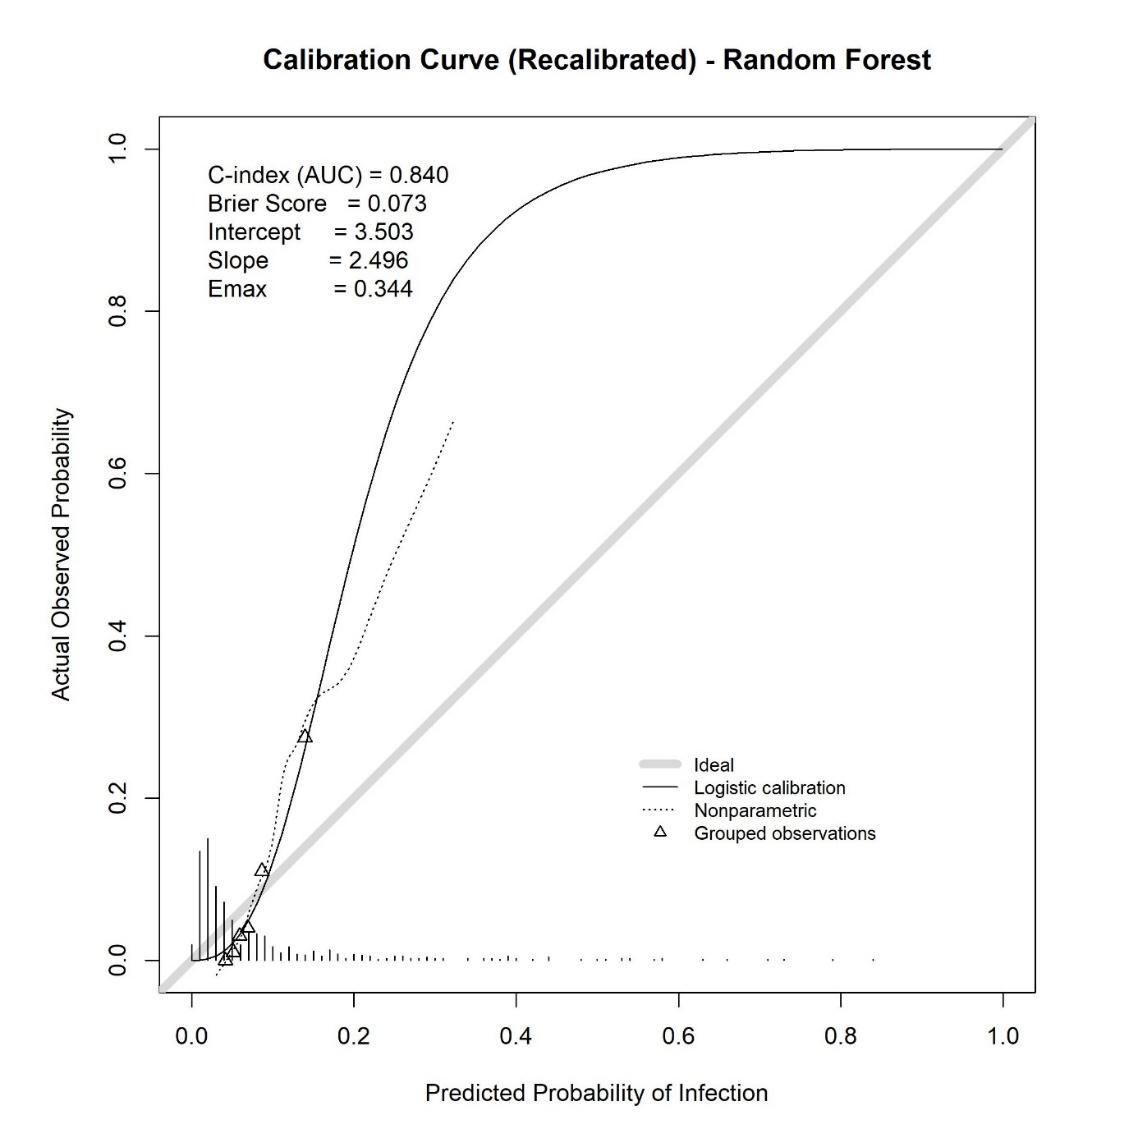


**Supplemental Figure 2: Calibration curve of the recalibrated random forest model for predicting infection**

Calibration plot comparing predicted probabilities versus actual observed probabilities of infection. The gray diagonal line represents ideal calibration. The solid curve indicates logistic calibration, and the dotted curve represents nonparametric calibration. Triangles denote grouped observations. The rug plot along the x-axis shows the distribution of predicted probabilities.


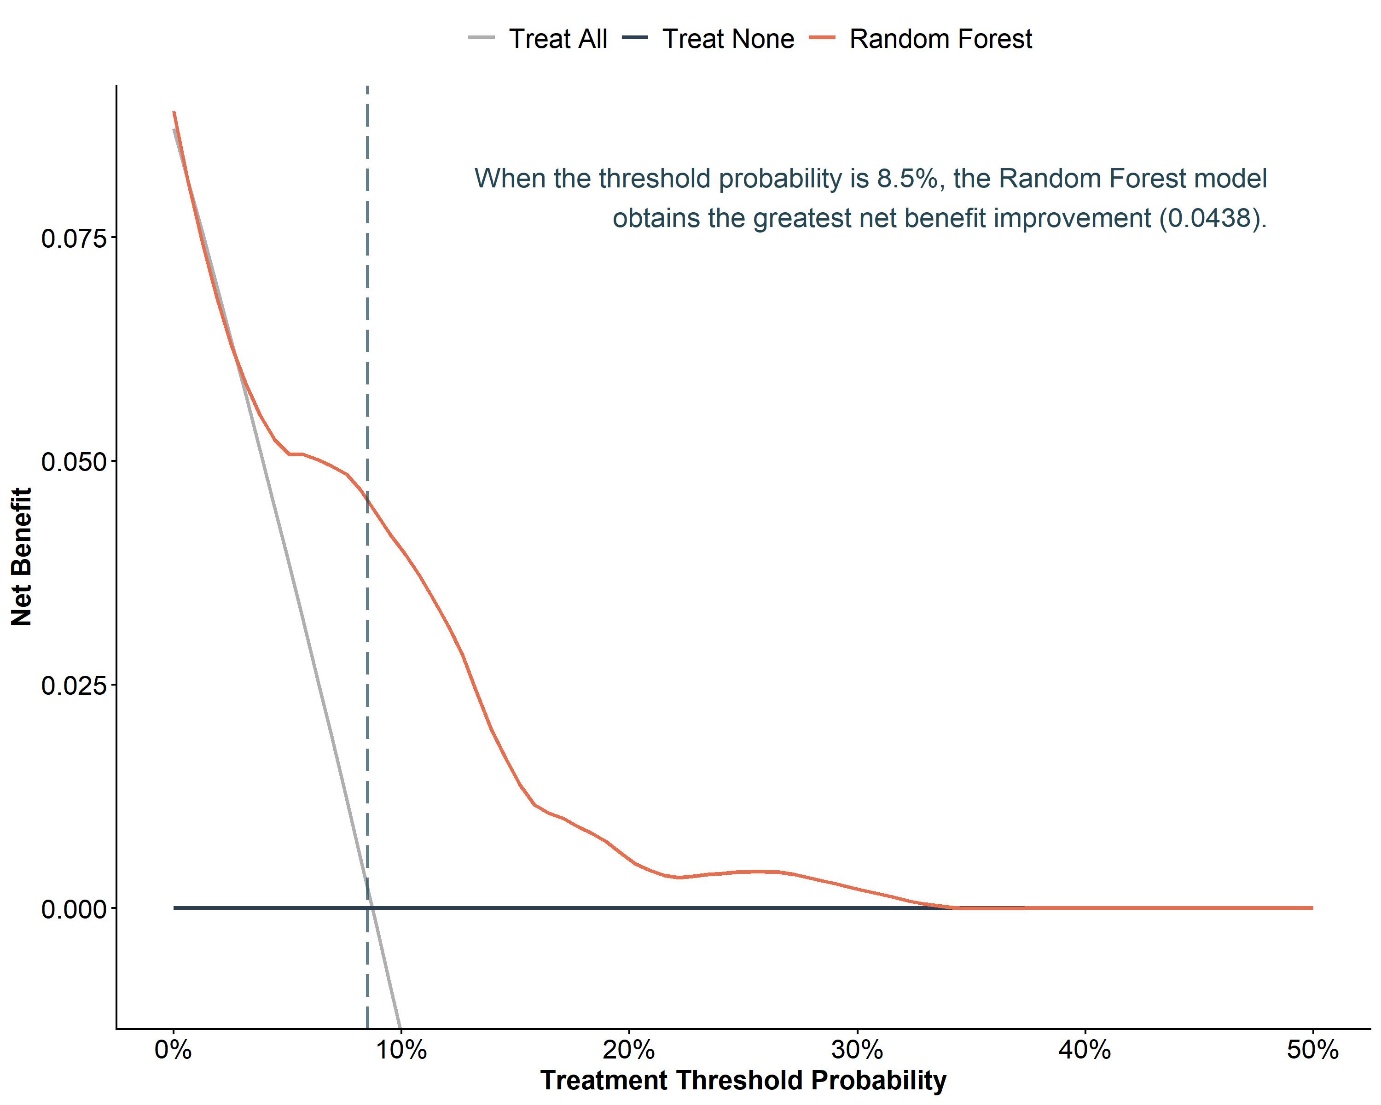


**Supplemental Figure 3: Decision curve analysis evaluating the clinical utility of the random forest model for predicting infection**

The x-axis represents the threshold probability at which clinicians would consider initiating treatment, and the y-axis represents net benefit. The gray line indicates the "treat-all" strategy (assume all patients require intervention), the black horizontal line represents the "treat-none" strategy (assume no patients require intervention), and the red curve shows the net benefit of using the random forest model


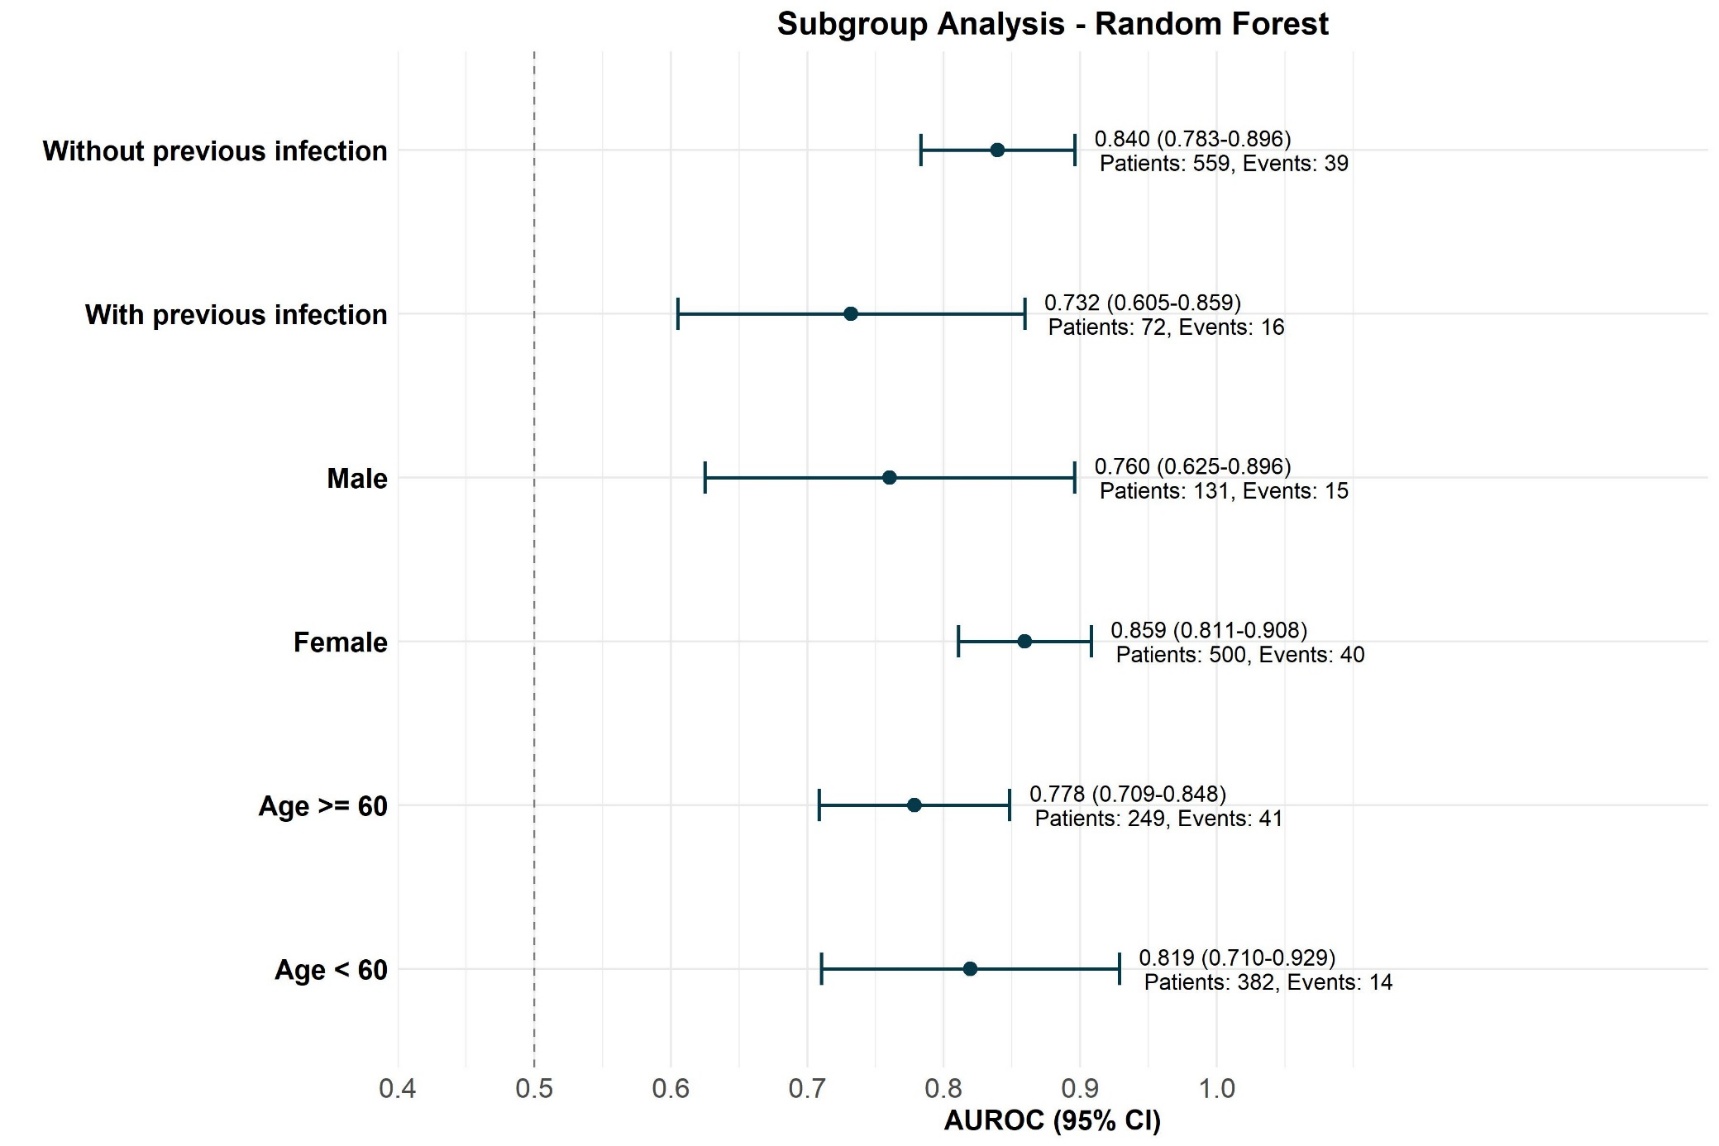


**Supplemental Figure 4: Subgroup analysis of the random forest model's discriminative performance across clinically relevant subgroups**

Forest plot shows the area under the receiver operating characteristic curve (AUROC) with 95% confidence intervals (CI) for the random forest model across predefined subgroups. Subgroups were stratified by previous infection history, sex, and age (≥60 vs. <60 years). The vertical dashed line at 0.5 represents the reference for no discrimination. The number of patients and infection events are displayed for each subgroup.

**Supplemental Table 1: Diagnostic codes used to identify infection and co-morbidities**

| **Description** | **ICD-9 Codes** | **ICD-10 Codes** |
| --- | --- | --- |
| ***Infection outcomes*** | | |
| Tuberculosis | 010-018 | A15-A19 |
| Atypical mycobacterial infections | 031 | A31 |
| Cryptococcosis | 117.5 | B45 |
| Histoplasmosis | 115 | B39 |
| Aspergillosis | 117.3 | B44 |
| Coccidioidomycosis | 114 | B38 |
| Blastomycosis | 116 | B40 |
| Candidiasis | 112 | B37 |
| Cytomegalovirus | 078.5 | B25 |
| Hepatitis B | 070.2, 070.3 | B16, B18.0, B18.1, B19.1 |
| Hepatitis C | 070.41, 070.44, 070.51, 070.54, 070.70, 070.71 | B17.1, B18.2, B19.2 |
| Toxoplasmosis | 130 | B58 |
| Pneumocystis carinii | 136.3 | B59 |
| Herpes zoster | 053 | B02 |
| Herpes simplex | 054 | B00 |
| Listeriosis | 027.0 | A32 |
| Pneumonia | 480-486, 513 | J12-J18, J85.1 |
| Sepsis/bacteraemia | 038, 790.7 | A40, A41, R78.81 |
| Meningitis/encephalitis | 320,323 | G00, G01, G02, G04, G05 - |
| Endocarditis | 421, 422.92 | I33, I40.0 |
| Pyelonephritis | 590 | N10 |
| Septic arthritis | 711.0, 711.9 | M00, M01.X0 |
| Osteomyelitis | 730 | M86 |
| Salmonella | 003 | A02 |
| Prosthetic joint infection | 996.66 | T84.5 |
| Infections of skin and subcutaneous tissue | 680-686 | L00-L08 |
| Abscess of anal and rectal regions | 566 | K61 |
| Peritonitis | 567 | K65 |
| Acute bronchitis and bronchiolitis | 466 | J20, J21 |
| Liver abscess | 572.0 | K75.0 |
| Acute pelvic inflammatory disease | 614.0, 614.3, 614.5 | N70.0, N70.1, N70.9 |
| Orchitis and epididymitis | 604 | N45 |
| Urinary tract infection | 599.0 | N39.0 |
| Acute upper respiratory infection | 465 | J06 |
| Submandibular gland infection | 527.8 | K11.8 |
| Infection of external ear | 380.1 | H60 |
| Necrotizing fasciitis | 728.86 | M72.6 |
| Bacterial infection in conditions classified elsewhere and of unspecified site | 041 | B99, A49 |
| Ill-defined intestinal infections | 009 | A09 |
| Viral infection in conditions classified elsewhere and of unspecified site | 079 | B34 |
| ***Comorbidities*** | | |
| Coronary artery disease and heart failure | 410-414, V45.81, 428, 398.91, 402.01, 402.11, 402.91, 404.01, 404.03, 404.11, 404.13, 404.91, 404.93 | I20-I25, Z95.1, I50, I09.81, I11.0, I13.0, I13.2 |
| Hyperlipidaemia | 272.0, 272.1, 272.2, 272.4 | E78.0, E78.1, E78.2, E78.4, E78.5 |
| Thyroid disorder | 242-244 | E05, E03.0, E03.1, E03.2, E03.8, E03.9, E89.0 |
| Osteoporosis | 733.0 | M80-M81 |
| Hypertension | 401-405, 437.2 | I10-I15, I67.4 |
| Diabetes mellitus | 250 | E08-E13 |
| Cerebrovascular disease | 430-438 | I60-I69 |
| Chronic obstructive pulmonary disease and Pneumoconiosis | 490-496, 500-505 | J40-J47, J60-J64, J66, J67 |
| Dementia | 290 | F01-F03 |
| Chronic renal failure | 582, 585, 586, 588, 583.0, 583.1, 583.2, 583.4 | N03, N18, N19, N25, N05.2, N05.5, N05.9 |
| Liver disease | 571.2, 571.4, 571.5, 571.6, 456.0-456.2, 572.2-572.4, 572.8 | K70.3, K73, K74.3, K74.4, K74.5, K74.6, I85.0, I85.1, K72.9, K76.6, K76.7, K72.1, K72.9 |
| Ulcers | 531-534 | K25-K28 |
| Primary immunodeficiency syndrome | 279 | D80-D84, D89 |
| Hemiplegia | 342 | G81 |
| Malignancy | 140-165, 170, 171, 172, 174, 175, 176, 179-208, | C00-C39, C40-C43, C45-C76, C81-C96 |

ICD-9: International Classification of Diseases, Ninth Revision; ICD-10: International Classification of Diseases, Tenth Revision

**Supplemental Table 2: World Health Organization (WHO) defined daily dose used to standardise the medications**

| **Description** | **WHO defined daily dose (mg)** | **Drug category** |
| --- | --- | --- |
| Diclofenac | 100 | NSAID |
| Celecoxib | 200 | NSAID |
| Etoricoxib | 60 | NSAID |
| Ketorolac | 30 | NSAID |
| Ibuprofen | 1200 | NSAID |
| Mefenamic | 1000 | NSAID |
| Meloxicam | 15 | NSAID |
| Naproxen | 500 | NSAID |
| Piroxicam | 20 | NSAID |
| Sulindac | 400 | NSAID |
| Prednisolone | 10 | STERIOD |
| Codeine | 100 | OPIOID |
| Dextropropoxyphene | 200 | OPIOID |
| Dihydrocodeine | 150 | OPIOID |
| Methadone | 25 | OPIOID |
| Morphine | 100 | OPIOID |
| Oxycodone | 75 | OPIOID |
| Tramadol | 300 | OPIOID |

NSAID: non-steroidal anti-inflammatory drug

**Supplemental Table 3: Laboratory test studied within 90 days before starting biologic or targeted synthetic disease-modifying antirheumatic drugs and their corresponding completion rate in the developing cohort (CDARS) and the validation cohort (All of Us)**

| **Description** | **Completion rate - CDARS** | **Completion rate – All of Us** |
| --- | --- | --- |
| Albumin | 96% | 56.69% |
| Alanine transaminase | 96% | 47.26% |
| Platelet | 96% | 50.57% |
| Creatinine | 96% | 61.30% |
| Urea | 96% | 55.72% |
| C-Reactive Protein | 94% | 29.32% |
| Erythrocyte Sedimentation Rate | 94% | 24.93% |
| Total Bilirubin | 92% | 54.20% |
| Red blood cell | 88% | 40.76% |
| White blood cell | 88% | 50.19% |
| Lymphocytes | 70% | 52.47% |
| Aspartate | 22% | - |
| Haemoglobin | 18% | - |
| IgG | 18% | - |
| Anti-nuclear antibodies | 18% | - |
| Complement 3 | 16% | - |
| Complement 4 | 14% | - |
| Haematocrit | 14% | - |
| Activated Partial Thromboplastin Time | 13% | - |
| IgM | 12% | - |
| IgA | 11% | - |
| Ferritin | 8% | - |
| Fibrinogen | 3% | - |
| Prothrombin Time | 3% | - |
| Thrombin Time | 1% | - |
| Indirect Bilirubin | 0% | - |
| IgE | 0% | - |

Laboratory tests with completion rate below 70% were removed from the model construction and not investigated for the external validation cohort.

**Supplemental Table 4: Area under the receiver operating characteristic (AUROC) and other metrics**

| **Model** | **AUROC** | **Sensitivity** | **Specificity** | **PPV** | **NPV** | **F1_Score** | **Accuracy** |
| --- | --- | --- | --- | --- | --- | --- | --- |
| CDARS - Validation set (N=631) | | | | | | | |
| Logistic Regression | 0.83 (0.778-0.882) | 0.818 | 0.729 | 0.224 | 0.977 | 0.352 | 0.737 |
| LASSO Regression | 0.836 (0.786-0.886) | 0.855 | 0.743 | 0.241 | 0.982 | 0.376 | 0.753 |
| Random Forest | 0.84 (0.793-0.888) | 0.727 | 0.767 | 0.23 | 0.967 | 0.349 | 0.764 |
| XGBoost | 0.795 (0.741-0.849) | 0.745 | 0.715 | 0.2 | 0.967 | 0.315 | 0.718 |
| Neural Network | 0.804 (0.747-0.862) | 0.855 | 0.639 | 0.184 | 0.979 | 0.303 | 0.658 |
| SVM | 0.833 (0.782-0.884) | 0.727 | 0.76 | 0.225 | 0.967 | 0.343 | 0.758 |
| External validation - All of Us (N= 1845) | | | | | | | |
| Random Forest | 0.729 (0.665-0.793) | 0.712 | 0.602 | 0.049 | 0.986 | 0.092 | 0.605 |

PPV: Positive predictive value; NPV: Negative predictive value; LASSO: Least Absolute Shrinkage and Selection Operator; XGBoost: Extreme Gradient Boosting; SVM: Support Vector Machine

**Supplemental Table 5: Quantitative characteristics of Partial Dependence Plots (PDP) for laboratory biomarkers**

| **Biomarkers** | **Effect range** | **Threshold value** | **Max slope** |
| --- | --- | --- | --- |
| Alanine transaminase (U/L) | 0.0015 | 47.8682 | -0.0006 |
| Albumin (g/L) | 0.0071 | 30.3101 | -0.0036 |
| CRP (mg/dL) | 0.0132 | 7.1048 | 0.0053 |
| Creatinine (µmol/L) | 0.0054 | 95.3469 | 0.0008 |
| ESR (mm/hr) | 0.0089 | 103.0070 | 0.0005 |
| Lymphocytes (%) | 0.0089 | 23.5842 | -0.0012 |
| Platelet (×10⁹/L) | 0.0047 | 191.1661 | -0.0001 |
| Red blood cell (×10¹²/L) | 0.0094 | 3.4515 | -0.0305 |
| Total bilirubin (µmol/L) | 0.0022 | 5.2224 | 0.0012 |
| Urea (mmol/L) | 0.0047 | 3.0225 | 0.0040 |
| White blood cell (×10⁹/L) | 0.0047 | 9.6323 | 0.0032 |

CRP: C-reactive protein; ESR: erythrocyte sedimentation rate.

Effect range represents the difference between maximum and minimum predicted probabilities across the PDP curve, indicating the total impact of each biomarker on infection risk. Threshold value indicates the biomarker level at which the predicted probability changes most rapidly (point of maximum absolute slope). Max slope represents the first derivative at the threshold point, with positive values indicating increased infection risk at higher biomarker levels and negative values indicating inverse relationships.
